# Supplementary material
Source: MDPI journal article supplement (https://www.mdpi.com/1424-8247/17/3/295)
Supplement: s1 [file s1]

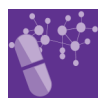

## Article

## Supplementary Materials

**Table S1.**  $R_f$  and  $R_m$  parameters determined by RP-TLC for thiazolo[3,2-b][1,2,4]triazoles (**1a–16a**) and imidazo[2,1-b][1,3,4]thiadiazoles (**1b–16b**) using isopropanol 70%–90% as mobile phase

| Compounds  | $R_f$ 70% | $R_f$ 75% | $R_f$ 80% | $R_f$ 85% | $R_f$ 90% | $R_m$ 70% | $R_m$ 75% | $R_m$ 80% | $R_m$ 85% | $R_m$ 90% |
|------------|-----------|-----------|-----------|-----------|-----------|-----------|-----------|-----------|-----------|-----------|
| <b>1a</b>  | 0.34      | 0.43      | 0.46      | 0.53      | 0.59      | 0.29      | 0.13      | 0.07      | −0.05     | −0.16     |
| <b>2a</b>  | 0.26      | 0.34      | 0.38      | 0.45      | 0.53      | 0.45      | 0.29      | 0.22      | 0.09      | −0.05     |
| <b>3a</b>  | 0.31      | 0.40      | 0.45      | 0.54      | 0.62      | 0.34      | 0.18      | 0.09      | −0.07     | −0.21     |
| <b>4a</b>  | 0.37      | 0.44      | 0.47      | 0.53      | 0.60      | 0.23      | 0.11      | 0.05      | −0.06     | −0.18     |
| <b>5a</b>  | 0.28      | 0.34      | 0.38      | 0.47      | 0.55      | 0.41      | 0.29      | 0.21      | 0.06      | −0.08     |
| <b>6a</b>  | 0.20      | 0.26      | 0.31      | 0.39      | 0.48      | 0.61      | 0.45      | 0.34      | 0.19      | 0.03      |
| <b>7a</b>  | 0.24      | 0.32      | 0.38      | 0.48      | 0.58      | 0.49      | 0.33      | 0.21      | 0.03      | −0.13     |
| <b>8a</b>  | 0.28      | 0.35      | 0.39      | 0.47      | 0.56      | 0.41      | 0.26      | 0.19      | 0.06      | −0.10     |
| <b>9a</b>  | 0.38      | 0.45      | 0.48      | 0.55      | 0.63      | 0.22      | 0.09      | 0.03      | −0.09     | −0.22     |
| <b>10a</b> | 0.28      | 0.35      | 0.40      | 0.46      | 0.55      | 0.42      | 0.26      | 0.18      | 0.07      | −0.09     |
| <b>11a</b> | 0.33      | 0.42      | 0.47      | 0.55      | 0.64      | 0.31      | 0.15      | 0.05      | −0.09     | −0.26     |
| <b>12a</b> | 0.39      | 0.47      | 0.49      | 0.56      | 0.63      | 0.20      | 0.06      | 0.01      | −0.11     | −0.23     |
| <b>13a</b> | 0.68      | 0.73      | 0.76      | 0.83      | 0.87      | −0.32     | −0.43     | −0.51     | −0.69     | −0.83     |
| <b>14a</b> | 0.63      | 0.68      | 0.73      | 0.78      | 0.82      | −0.23     | −0.32     | −0.42     | −0.55     | −0.65     |
| <b>15a</b> | 0.65      | 0.69      | 0.76      | 0.81      | 0.85      | −0.27     | −0.35     | −0.49     | −0.64     | −0.77     |
| <b>16a</b> | 0.70      | 0.73      | 0.77      | 0.81      | 0.83      | −0.37     | −0.43     | −0.51     | −0.64     | −0.70     |
| <b>1b</b>  | 0.33      | 0.40      | 0.46      | 0.52      | 0.60      | 0.32      | 0.17      | 0.08      | −0.03     | −0.17     |
| <b>2b</b>  | 0.27      | 0.30      | 0.41      | 0.49      | 0.57      | 0.43      | 0.37      | 0.16      | 0.02      | −0.12     |
| <b>3b</b>  | 0.31      | 0.39      | 0.46      | 0.54      | 0.64      | 0.35      | 0.20      | 0.07      | −0.07     | −0.25     |
| <b>4b</b>  | 0.34      | 0.41      | 0.45      | 0.51      | 0.59      | 0.29      | 0.16      | 0.09      | −0.02     | −0.16     |
| <b>5b</b>  | 0.29      | 0.33      | 0.41      | 0.50      | 0.58      | 0.38      | 0.31      | 0.16      | 0.01      | −0.13     |
| <b>6b</b>  | 0.24      | 0.30      | 0.37      | 0.46      | 0.49      | 0.49      | 0.38      | 0.23      | 0.08      | 0.02      |
| <b>7b</b>  | 0.31      | 0.36      | 0.46      | 0.55      | 0.59      | 0.36      | 0.24      | 0.07      | −0.09     | −0.15     |
| <b>8b</b>  | 0.29      | 0.35      | 0.43      | 0.50      | 0.52      | 0.38      | 0.26      | 0.12      | 0.00      | −0.03     |
| <b>9b</b>  | 0.32      | 0.36      | 0.43      | 0.50      | 0.51      | 0.34      | 0.25      | 0.12      | 0.01      | −0.02     |
| <b>10b</b> | 0.26      | 0.31      | 0.38      | 0.45      | 0.49      | 0.45      | 0.34      | 0.21      | 0.09      | 0.02      |
| <b>11b</b> | 0.32      | 0.36      | 0.44      | 0.52      | 0.56      | 0.34      | 0.25      | 0.11      | −0.03     | −0.11     |
| <b>12b</b> | 0.35      | 0.39      | 0.45      | 0.50      | 0.54      | 0.26      | 0.20      | 0.08      | 0.01      | −0.07     |
| <b>13b</b> | 0.66      | 0.68      | 0.75      | 0.79      | 0.81      | −0.28     | −0.33     | −0.49     | −0.59     | −0.64     |
| <b>14b</b> | 0.61      | 0.65      | 0.71      | 0.79      | 0.81      | −0.20     | −0.26     | −0.39     | −0.59     | −0.64     |
| <b>15b</b> | 0.63      | 0.68      | 0.75      | 0.83      | 0.86      | −0.24     | −0.33     | −0.47     | −0.70     | −0.78     |
| <b>16b</b> | 0.68      | 0.72      | 0.75      | 0.82      | 0.83      | −0.33     | −0.40     | −0.49     | −0.65     | −0.69     |

Values represent the average of three determinations for each mobile phase concentration.

**Table S2.** The lipophilicity parameters for thiazolo[3,2-b][1,2,4]triazoles (**1a–16a**) and imidazo[2,1-b][1,3,4]thiadiazoles (**1b–16b**) determined by RP-TLC

| Compounds | Experimental parameters |                 |        |                |                      |                  |
|-----------|-------------------------|-----------------|--------|----------------|----------------------|------------------|
|           | mR <sub>M</sub>         | R <sub>M0</sub> | b      | φ <sub>0</sub> | PC1(R <sub>M</sub> ) | r <sup>2</sup> * |
| 1a        | 0.056                   | 1.810           | −0.022 | 82.63          | −0.309               | 0.9853           |
| 2a        | 0.200                   | 2.130           | −0.024 | 88.37          | −0.821               | 0.9898           |
| 3a        | 0.065                   | 2.229           | −0.027 | 82.54          | −0.341               | 0.9938           |
| 4a        | 0.031                   | 1.612           | −0.020 | 81.40          | −0.216               | 0.9912           |
| 5a        | 0.178                   | 2.131           | −0.024 | 87.32          | −0.743               | 0.9919           |
| 6a        | 0.324                   | 2.582           | −0.028 | 91.57          | −1.267               | 0.9964           |
| 7a        | 0.186                   | 2.648           | −0.031 | 85.99          | −0.775               | 0.9963           |
| 8a        | 0.166                   | 2.126           | −0.025 | 86.79          | −0.701               | 0.9880           |
| 9a        | 0.006                   | 1.705           | −0.021 | 80.40          | −0.127               | 0.9862           |
| 10a       | 0.168                   | 2.132           | −0.025 | 87.00          | −0.711               | 0.9895           |
| 11a       | 0.032                   | 2.217           | −0.027 | 81.22          | −0.226               | 0.9924           |
| 12a       | −0.013                  | 1.696           | −0.021 | 79.62          | −0.058               | 0.9956           |
| 13a       | −0.555                  | 1.472           | −0.026 | 57.72          | 1.875                | 0.9990           |
| 14a       | −0.435                  | 1.309           | −0.022 | 60.05          | 1.448                | 0.9961           |
| 15a       | −0.504                  | 1.534           | −0.026 | 60.16          | 1.694                | 0.9897           |
| 16a       | −0.529                  | 0.864           | −0.017 | 49.68          | 1.788                | 0.9865           |
| 1b        | 0.072                   | 1.955           | −0.024 | 83.18          | −0.365               | 0.9944           |
| 2b        | 0.174                   | 2.507           | −0.029 | 85.86          | −0.730               | 0.9833           |
| 3b        | 0.062                   | 2.410           | −0.029 | 81.96          | −0.331               | 0.9956           |
| 4b        | 0.071                   | 1.805           | −0.022 | 83.16          | −0.362               | 0.9899           |
| 5b        | 0.144                   | 2.270           | −0.027 | 85.32          | −0.624               | 0.9878           |
| 6b        | 0.239                   | 2.454           | −0.028 | 87.94          | −0.960               | 0.9959           |
| 7b        | 0.086                   | 2.468           | −0.030 | 82.28          | −0.414               | 0.9936           |
| 8b        | 0.148                   | 2.183           | −0.026 | 84.92          | −0.634               | 0.9987           |
| 9b        | 0.138                   | 1.900           | −0.022 | 85.59          | −0.596               | 0.9963           |
| 10b       | 0.222                   | 1.990           | −0.022 | 90.04          | −0.899               | 0.9907           |
| 11b       | 0.110                   | 1.973           | −0.023 | 84.69          | −0.498               | 0.9919           |
| 12b       | 0.097                   | 1.460           | −0.017 | 85.89          | −0.450               | 0.9909           |
| 13b       | −0.464                  | 0.988           | −0.018 | 53.99          | 1.554                | 0.9856           |
| 14b       | −0.416                  | 1.399           | −0.023 | 62.17          | 1.382                | 0.9889           |
| 15b       | −0.504                  | 1.725           | −0.028 | 62.28          | 1.693                | 0.9903           |
| 16b       | −0.511                  | 0.938           | −0.018 | 52.12          | 1.723                | 0.9950           |

\* Determination coefficient for linear dependence of R<sub>M</sub> with the fraction of organic solvent in the mobile phase

**Table S3.** Computed lipophilicity parameters for the investigated thiazolo[3,2-b][1,2,4]triazoles (**1a–16a**) and imidazo[2,1-b][1,3,4]thiadiazoles (**1b–16b**)

| Compounds |        |        | Log P |       |        |        |        |       |       |            |                   |                   |       |                      |                           |
|-----------|--------|--------|-------|-------|--------|--------|--------|-------|-------|------------|-------------------|-------------------|-------|----------------------|---------------------------|
|           | ALOGPs | ACLOGP | ALOGP | MLOGP | miLOGP | XLOGP2 | XLOGP3 | iLOGP | WLOGP | Silicos-IT | LogP <sub>c</sub> | LogP <sub>v</sub> | CLogP | LogP <sub>chem</sub> | LogP <sub>calcd</sub> ±SD |
| 1a        | 4.73   | 4.64   | 4.40  | 4.53  | 4.29   | 4.68   | 4.17   | 3.02  | 4.12  | 4.10       | 5.95              | 6.13              | 3.52  | 5.11                 | 4.53±0.82                 |
| 2a        | 4.97   | 5.33   | 5.14  | 5.16  | 5.1    | 5.48   | 4.86   | 3.40  | 4.89  | 4.75       | 6.78              | 6.92              | 4.25  | 5.88                 | 5.21±0.90                 |
| 3a        | 5.02   | 5.39   | 5.34  | 5.40  | 5.18   | 5.61   | 5.06   | 3.44  | 6.30  | 5.07       | 6.87              | 7.01              | 4.37  | 5.99                 | 5.43±0.93                 |
| 4a        | 4.41   | 4.53   | 4.38  | 4.23  | 4.35   | 4.59   | 4.14   | 3.27  | 4.13  | 4.09       | 5.82              | 5.88              | 3.45  | 4.91                 | 4.44±0.73                 |
| 5a        | 5.03   | 5.25   | 5.06  | 5.04  | 4.97   | 5.30   | 4.80   | 3.32  | 4.78  | 4.71       | 6.51              | 6.65              | 4.13  | 5.67                 | 5.09±0.84                 |
| 6a        | 5.62   | 5.95   | 5.81  | 5.66  | 5.78   | 6.10   | 5.49   | 3.66  | 5.54  | 5.36       | 7.34              | 7.44              | 4.86  | 6.44                 | 5.79±0.94                 |
| 7a        | 5.50   | 6.01   | 6.00  | 5.89  | 5.86   | 6.23   | 5.68   | 3.49  | 6.95  | 5.71       | 7.43              | 7.53              | 4.98  | 6.55                 | 5.99±1.02                 |
| 8a        | 4.75   | 5.14   | 5.04  | 4.74  | 5.03   | 5.22   | 4.77   | 3.60  | 4.79  | 4.72       | 6.38              | 6.40              | 4.06  | 5.48                 | 5.01±0.75                 |
| 9a        | 4.41   | 4.53   | 4.38  | 4.23  | 4.35   | 4.59   | 4.14   | 3.24  | 4.13  | 4.09       | 5.82              | 5.88              | 3.45  | 4.91                 | 4.44±0.73                 |
| 10a       | 5.02   | 5.23   | 5.13  | 4.86  | 5.16   | 5.39   | 4.83   | 3.60  | 4.9   | 4.75       | 6.65              | 6.67              | 4.18  | 5.68                 | 5.15±0.82                 |
| 11a       | 5.01   | 5.29   | 5.32  | 5.09  | 5.24   | 5.52   | 5.03   | 3.57  | 6.30  | 5.11       | 6.74              | 6.76              | 4.30  | 5.79                 | 5.36±0.86                 |
| 12a       | 4.10   | 4.43   | 4.36  | 3.95  | 4.4    | 4.51   | 4.11   | 3.56  | 4.14  | 4.12       | 5.70              | 5.63              | 3.38  | 4.72                 | 4.37±0.65                 |
| 13a       | 3.45   | 3.24   | 3.22  | 3.10  | 2.98   | 3.14   | 2.74   | 2.38  | 3.85  | 2.13       | 4.69              | 5.02              | 2.29  | 3.78                 | 3.29±0.84                 |
| 14a       | 3.89   | 3.94   | 3.97  | 3.73  | 3.79   | 3.94   | 3.43   | 2.73  | 4.62  | 2.81       | 5.52              | 5.81              | 3.01  | 4.55                 | 3.98±0.91                 |
| 15a       | 4.31   | 4.00   | 4.17  | 3.96  | 3.88   | 4.06   | 3.62   | 2.68  | 6.02  | 3.18       | 5.61              | 5.90              | 3.14  | 4.66                 | 4.23±1.02                 |
| 16a       | 3.24   | 3.13   | 3.21  | 2.85  | 3.04   | 3.05   | 2.71   | 2.24  | 3.86  | 2.17       | 4.57              | 4.76              | 2.22  | 3.58                 | 3.19±0.80                 |
| 1b        | 4.09   | 4.96   | 4.26  | 3.72  | 4.29   | 4.25   | 4.17   | 3.07  | 4.12  | 4.10       | 5.21              | 5.32              | 3.31  | 4.84                 | 4.27±0.65                 |
| 2b        | 4.91   | 5.66   | 5.01  | 4.35  | 5.1    | 5.05   | 4.86   | 3.42  | 4.89  | 4.75       | 6.04              | 6.11              | 4.04  | 5.61                 | 4.99±0.74                 |
| 3b        | 4.63   | 5.72   | 5.20  | 4.58  | 5.18   | 5.18   | 5.06   | 3.33  | 6.30  | 5.07       | 6.13              | 6.20              | 4.16  | 5.72                 | 5.18±0.83                 |
| 4b        | 3.99   | 4.86   | 4.24  | 3.42  | 4.35   | 4.17   | 4.14   | 3.31  | 4.13  | 4.09       | 5.09              | 5.07              | 3.24  | 4.68                 | 4.20±0.60                 |
| 5b        | 4.52   | 5.58   | 4.92  | 4.23  | 4.97   | 4.88   | 4.80   | 3.27  | 4.78  | 4.71       | 5.77              | 5.84              | 3.92  | 5.44                 | 4.83±0.71                 |
| 6b        | 5.32   | 6.27   | 5.67  | 4.85  | 5.78   | 5.67   | 5.49   | 3.64  | 5.54  | 5.36       | 6.60              | 6.63              | 4.65  | 6.21                 | 5.55±0.80                 |
| 7b        | 5.08   | 6.34   | 5.87  | 5.08  | 5.86   | 5.80   | 5.68   | 3.57  | 6.95  | 5.71       | 6.69              | 6.72              | 4.77  | 6.32                 | 5.75±0.90                 |
| 8b        | 4.43   | 5.47   | 4.91  | 3.93  | 5.03   | 4.79   | 4.77   | 3.57  | 4.79  | 4.72       | 5.64              | 5.58              | 3.85  | 5.29                 | 4.77±0.64                 |
| 9b        | 3.98   | 4.86   | 4.24  | 3.42  | 4.35   | 4.17   | 4.14   | 3.31  | 4.13  | 4.09       | 5.09              | 5.07              | 3.24  | 4.68                 | 4.20±0.60                 |
| 10b       | 4.75   | 5.56   | 4.99  | 4.04  | 5.16   | 4.97   | 4.83   | 3.69  | 4.90  | 4.75       | 5.91              | 5.86              | 3.97  | 5.45                 | 4.92±0.67                 |
| 11b       | 4.50   | 5.62   | 5.19  | 4.27  | 5.24   | 5.09   | 5.03   | 3.59  | 6.30  | 5.11       | 6.01              | 5.95              | 4.09  | 5.56                 | 5.11±0.78                 |
| 12b       | 3.80   | 4.75   | 4.23  | 3.14  | 4.4    | 4.08   | 4.11   | 3.59  | 4.14  | 4.12       | 4.96              | 4.81              | 3.17  | 4.53                 | 4.13±0.56                 |
| 13b       | 3.14   | 3.57   | 3.09  | 2.28  | 2.98   | 2.71   | 2.74   | 1.81  | 3.85  | 2.13       | 3.96              | 4.20              | 2.08  | 3.45                 | 3.00±0.75                 |
| 14b       | 3.67   | 4.27   | 3.84  | 2.91  | 3.79   | 3.51   | 3.43   | 2.68  | 4.62  | 2.81       | 4.79              | 5.00              | 2.80  | 4.22                 | 3.74±0.77                 |
| 15b       | 3.97   | 4.33   | 4.03  | 3.15  | 3.88   | 3.64   | 3.62   | 2.11  | 6.02  | 3.18       | 4.88              | 5.09              | 2.93  | 4.32                 | 3.94±0.98                 |
| 16b       | 3.21   | 3.46   | 3.07  | 2.04  | 3.04   | 2.63   | 2.71   | 2.14  | 3.86  | 2.17       | 3.83              | 3.95              | 2.01  | 3.29                 | 2.96±0.69                 |

ALOGPs, ACLOG, ALOGP, MLOGP, XLOGP2-predicted by ALOGPS 2.1. [37] software; iLOGP, XLOGP3, WLOGP, SILICOS-IT – predicted by SwissADME [10] platform; LogP<sub>v</sub>, LogP<sub>c</sub>, – predicted by ChemDraw Ultra v.12.; CLogP-predicted by OSIRIS [13]; mi-LOGP- predicted by MOLINSPIRATION [14]; LogP<sub>chem</sub>-predicted by Chemicalize [27] platform developed by ChemAxon; LogP<sub>calcd</sub> ± SD– mean of all predicted LogP ± standard deviation.

**Table S4.** Predicted pKa values for thiazolo[3,2-b][1,2,4]triazoles (**1a–16a**) and imidazo[2,1-b][1,3,4]thiadiazoles (**1b–16b**) [27]

| Thiazolo[3,2-b][1,2,4]triazoles |                                                                                             |                                                                                              | Imidazo[2,1-b][1,3,4]thiadiazoles |                                                                                              |                                                                                                |
|---------------------------------|---------------------------------------------------------------------------------------------|----------------------------------------------------------------------------------------------|-----------------------------------|----------------------------------------------------------------------------------------------|------------------------------------------------------------------------------------------------|
| Compounds                       | pKa1                                                                                        | pKa2                                                                                         | Compounds                         | pKa1                                                                                         | pKa2                                                                                           |
|                                 | 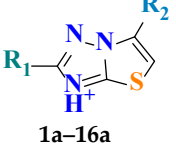<br>1a–16a | <br>13a–16a |                                   | <br>1b–16b | <br>13b–16b |
| 1a                              | −0.05                                                                                       | NA                                                                                           | 1b                                | 2.68                                                                                         | NA                                                                                             |
| 2a                              | −0.05                                                                                       | NA                                                                                           | 2b                                | 2.68                                                                                         | NA                                                                                             |
| 3a                              | −0.05                                                                                       | NA                                                                                           | 3b                                | 2.68                                                                                         | NA                                                                                             |
| 4a                              | −0.03                                                                                       | NA                                                                                           | 4b                                | 2.68                                                                                         | NA                                                                                             |
| 5a                              | −0.05                                                                                       | NA                                                                                           | 5b                                | 2.68                                                                                         | NA                                                                                             |
| 6a                              | −0.05                                                                                       | NA                                                                                           | 6b                                | 2.68                                                                                         | NA                                                                                             |
| 7a                              | −0.05                                                                                       | NA                                                                                           | 7b                                | 2.68                                                                                         | NA                                                                                             |
| 8a                              | −0.03                                                                                       | NA                                                                                           | 8b                                | 2.68                                                                                         | NA                                                                                             |
| 9a                              | −0.04                                                                                       | NA                                                                                           | 9b                                | 2.70                                                                                         | NA                                                                                             |
| 10a                             | −0.05                                                                                       | NA                                                                                           | 10b                               | 2.70                                                                                         | NA                                                                                             |
| 11a                             | −0.05                                                                                       | NA                                                                                           | 11b                               | 2.70                                                                                         | NA                                                                                             |
| 12a                             | −0.02                                                                                       | NA                                                                                           | 12b                               | 2.70                                                                                         | NA                                                                                             |
| 13a                             | −0.06                                                                                       | 9.87                                                                                         | 13b                               | 2.64                                                                                         | 9.89                                                                                           |
| 14a                             | −0.06                                                                                       | 9.87                                                                                         | 14b                               | 2.64                                                                                         | 9.89                                                                                           |
| 15a                             | −0.06                                                                                       | 9.87                                                                                         | 15b                               | 2.64                                                                                         | 9.89                                                                                           |
| 16a                             | −0.04                                                                                       | 9.87                                                                                         | 16b                               | 2.64                                                                                         | 9.89                                                                                           |

NA-non applicable.
